# Supplementary material for: The Course of COVID-19 and Long COVID: Identifying Risk Factors among Patients Suffering from the Disease before and during the Omicron-Dominant Period
Source: MDPI journal article supplement (doi:10.3390/pathogens13030267), 2024-03-20
Supplement: s1 [file s1]

Table S1. Comparison of the clinical picture of COVID-19 in the pre-omicron and omicron periods, with a breakdown of vaccinated and unvaccinated patients against COVID-

| Variable                     | Vaccinated           |                 |                   | Unvaccinated             |                     |                 |                   |                         |
|------------------------------|----------------------|-----------------|-------------------|--------------------------|---------------------|-----------------|-------------------|-------------------------|
|                              | pre-Omicron (N=1114) | Omicron (N=476) | p-value           | The whole group (N=1590) | pre-Omicron (N=194) | Omicron (N=182) | p-value           | The whole group (N=376) |
| Temperature <36.6°C          | 177 (15.9)           | 61 (12.8)       | 0.112#            | 238 (14.9)               | 32 (16.5)           | 11 (6.0)        | <b>0.001#</b>     | 43 (11.4)               |
| Temperature >37.5°C          | 590 (53.0)           | 231 (48.4)      | 0.097#            | 821 (51.6)               | 115 (59.3)          | 107 (58.8)      | 0.923#            | 222 (59.0)              |
| Cough                        | 711 (63.8)           | 375 (78.8)      | <b>&lt;0.001#</b> | 1086 (68.3)              | 140 (72.2)          | 129 (70.9)      | 0.782#            | 269 (71.5)              |
| Dyspnea                      | 569 (51.1)           | 232 (48.6)      | 0.372#            | 801 (50.3)               | 94 (48.5)           | 97 (53.3)       | 0.348#            | 191 (50.8)              |
| Chest pain                   | 510 (45.8)           | 196 (41.1)      | 0.084#            | 706 (44.4)               | 94 (48.5)           | 88 (48.6)       | 0.974#            | 182 (48.4)              |
| Fatigue                      | 843 (75.7)           | 325 (68.1)      | <b>&lt;0.001#</b> | 1168 (73.4)              | 149 (76.8)          | 121 (66.5)      | <b>0.025#</b>     | 270 (71.8)              |
| Musculoskeletal pain         | 776 (69.7)           | 344 (72.1)      | 0.325#            | 1120 (70.4)              | 145 (74.7)          | 121 (66.5)      | 0.078#            | 266 (70.7)              |
| Smell and/or taste disorders | 588 (52.8)           | 23 (4.8)        | <b>&lt;0.001#</b> | 611 (38.4)               | 92 (47.4)           | 8 (4.4)         | <b>&lt;0.001#</b> | 100 (26.6)              |
| Headache                     | 654 (58.7)           | 272 (57.0)      | 0.263#            | 926 (58.2)               | 136 (70.1)          | 91 (50.0)       | <b>&lt;0.001#</b> | 227 (60.4)              |
| Diarrhea                     | 233 (20.9)           | 73 (15.3)       | <b>0.009#</b>     | 306 (19.2)               | 44 (22.7)           | 40 (21.9)       | 0.870#            | 84 (22.3)               |
| Vomiting                     | 87 (7.8)             | 29 (6.1)        | 0.223#            | 116 (7.3)                | 14 (7.2)            | 14 (7.7)        | 0.869#            | 28 (7.4)                |
| Hearing impairment           | 108 (9.7)            | 56 (11.7)       | 0.218#            | 164 (10.3)               | 22 (11.3)           | 21 (11.5)       | 0.951#            | 43 (11.4)               |
| Duration of symptoms         | 12.3 ± 6.8           | 11.0 ± 7.0      | <b>&lt;0.001*</b> | 11.9 ± 6.9               | 13.0 ± 6.9          | 11.4 ± 8.6      | <b>&lt;0.001*</b> | 12.3 ± 7.8              |
| COVID-19 course severity     | 0                    | 69 (6.2)        | <b>&lt;0.001#</b> | 73 (4.6)                 | 11 (5.7)            | 4 (2.2)         | 0.141#            | 15 (4.0)                |
|                              | 1                    | 314 (28.2)      |                   | 473 (29.8)               | 46 (23.7)           | 56 (30.8)       |                   | 102 (27.1)              |
|                              | 2                    | 303 (27.2)      |                   | 479 (30.1)               | 61 (31.4)           | 52 (28.6)       |                   | 113 (30.1)              |
|                              | 3                    | 248 (22.2)      |                   | 333 (20.9)               | 48 (24.7)           | 36 (19.8)       |                   | 84 (22.3)               |
|                              | 4                    | 180 (16.2)      |                   | 233 (14.6)               | 28 (14.4)           | 34 (18.7)       |                   | 62 (16.5)               |

N – number; \* – Mann U Whitney Test; # – Chi-square test; 0 – patients without clinical symptoms or with symptoms lasting up to 3 days; 1 – patients treated at home with symptoms lasting up to 7 days; 2 – patients treated at home with symptoms lasting from 7 to 14 days; 3 – patients treated at home with symptoms lasting at least 14 days and fever greater than 38°C, dyspnea, and saturation <94% for at least 3 days; 4 – hospitalized patients. Data presented as N (%) or mean ± standard deviation.

Table S2. Comparison of the clinical picture of long COVID in the pre-omicron and omicron periods, with a breakdown of vaccinated and unvaccinated patients against COVID-19.

| Variable                          | Vaccinated           |                 |         |                          | Unvaccinated        |                 |         |                         |
|-----------------------------------|----------------------|-----------------|---------|--------------------------|---------------------|-----------------|---------|-------------------------|
|                                   | pre-Omicron (N=1114) | Omicron (N=476) | p-value | The whole group (N=1590) | pre-Omicron (N=194) | Omicron (N=182) | p-value | The whole group (N=376) |
| Long COVID                        | 739 (66.3)           | 223 (46.8)      | <0.001# | 962 (60.5)               | 136 (70.1)          | 91 (50.0)       | <0.001# | 227 (60.4)              |
| Fatigue                           | 421 (37.8)           | 128 (26.8)      | <0.001# | 549 (34.5)               | 77 (39.7)           | 42 (23.1)       | 0.005#  | 119 (31.6)              |
| Cough                             | 33 (2.9)             | 8 (1.7)         | 0.138#  | 41 (2.6)                 | 5 (2.6)             | 2 (1.1)         | 0.289#  | 7 (1.9)                 |
| Dyspnea                           | 79 (7.1)             | 12 (2.5)        | 0.003#  | 91 (5.7)                 | 13 (6.7)            | 3 (1.7)         | 0.015#  | 16 (4.3)                |
| Smell and/or taste disorders      | 55 (4.9)             | 11 (2.3)        | 0.016#  | 66 (4.1)                 | 8 (4.1)             | 4 (2.2)         | 0.288#  | 12 (3.2)                |
| Musculoskeletal pain              | 48 (4.3)             | 12 (2.5)        | 0.085#  | 60 (3.8)                 | 7 (3.6)             | 5 (2.8)         | 0.635#  | 12 (3.2)                |
| Chest pain                        | 67 (6.0)             | 10 (2.1)        | <0.001# | 77 (4.8)                 | 12 (6.2)            | 6 (3.3)         | 0.189#  | 18 (4.8)                |
| Hair loss                         | 51 (4.6)             | 9 (1.9)         | 0.009#  | 60 (3.8)                 | 13 (6.7)            | 13 (7.2)        | 0.858#  | 26 (6.9)                |
| Concentration and memory problems | 145 (13.0)           | 37 (7.8)        | 0.002#  | 182 (11.4)               | 26 (13.4)           | 9 (5.0)         | 0.004#  | 35 (9.3)                |
| Headache                          | 18 (1.6)             | 7 (1.5)         | 0.831#  | 25 (1.6)                 | 7 (3.6)             | 1 (0.6)         | 0.083#  | 8 (2.1)                 |

N – number. Data presented as N (%), # – Chi-square test;
